# Supplementary material for: How I treat recurrent pediatric high-grade glioma (pHGG): a Europe-wide survey study
Source: PubMed Central journal article supplement (PMC9992031; doi:10.1007/s11060-023-04241-6), 2023-02-01
Supplement: 11060_2023_4241_MOESM2_ESM.pdf [file 11060_2023_4241_MOESM2_ESM.pdf]

Supplementary Table S2:

**Ongoing early phase clinical trials including paediatric patients with recurrent/progressing pHGG (n=56)**  
(ClinicalTrials.gov, EudraCT; status: ongoing; 8 March 2022)

| ID          | Phase         | Status                 | Intervention                                                                                                   | Type       | Country                                                                                 | Link                                                                                                  |
|-------------|---------------|------------------------|----------------------------------------------------------------------------------------------------------------|------------|-----------------------------------------------------------------------------------------|-------------------------------------------------------------------------------------------------------|
| NCT05096481 | Phase 2       | Not yet recruiting     | PEP-CMV / Tetanus Diphtheria Vaccine / Temozolomide                                                            | IT + CT    | US                                                                                      | <a href="https://ClinicalTrials.gov/show/NCT05096481">https://ClinicalTrials.gov/show/NCT05096481</a> |
| NCT03033992 |               | Recruiting             | Optune System (NovoTTF-200A System)                                                                            | TTF        | US                                                                                      | <a href="https://ClinicalTrials.gov/show/NCT03033992">https://ClinicalTrials.gov/show/NCT03033992</a> |
| NCT05082493 | Phase 1       | Not yet recruiting     | Berubicin Hydrochloride                                                                                        | CT         |                                                                                         | <a href="https://ClinicalTrials.gov/show/NCT05082493">https://ClinicalTrials.gov/show/NCT05082493</a> |
| NCT04323046 | Phase 1       | Recruiting             | Ipilimumab / Nivolumab / Placebo                                                                               | IT         | US, AU, IL, Europe (CH)                                                                 | <a href="https://ClinicalTrials.gov/show/NCT04323046">https://ClinicalTrials.gov/show/NCT04323046</a> |
| NCT03299309 | Phase 1       | Recruiting             | PEP-CMV                                                                                                        | IT         | US                                                                                      | <a href="https://ClinicalTrials.gov/show/NCT03299309">https://ClinicalTrials.gov/show/NCT03299309</a> |
| NCT04295759 | Phase 1       | Recruiting             | INCB7839                                                                                                       | TT         | US                                                                                      | <a href="https://ClinicalTrials.gov/show/NCT04295759">https://ClinicalTrials.gov/show/NCT04295759</a> |
| NCT03128047 | Phase 1       | Recruiting             | Optune NovoTTF-200A System                                                                                     | TTF        | US                                                                                      | <a href="https://ClinicalTrials.gov/show/NCT03128047">https://ClinicalTrials.gov/show/NCT03128047</a> |
| NCT02359565 | Phase 1       | Recruiting             | Pembrolizumab                                                                                                  | IT         | US                                                                                      | <a href="https://ClinicalTrials.gov/show/NCT02359565">https://ClinicalTrials.gov/show/NCT02359565</a> |
| NCT04482933 | Phase 2       | Not yet recruiting     | Biological G207                                                                                                | IT         | US                                                                                      | <a href="https://ClinicalTrials.gov/show/NCT04482933">https://ClinicalTrials.gov/show/NCT04482933</a> |
| NCT04978727 | Phase 1       | Active, not recruiting | SurVaxM                                                                                                        | IT         | US                                                                                      | <a href="https://ClinicalTrials.gov/show/NCT04978727">https://ClinicalTrials.gov/show/NCT04978727</a> |
| NCT04201457 | Phase 1/2     | Recruiting             | Dabrafenib / Trametinib / Hydroxychloroquine                                                                   | TT + OTHER | US                                                                                      | <a href="https://ClinicalTrials.gov/show/NCT04201457">https://ClinicalTrials.gov/show/NCT04201457</a> |
| NCT03690869 | Phase 1/2     | Recruiting             | Cemiplimab (monotherapy) / Irradiation                                                                         | IT + RT    | US                                                                                      | <a href="https://ClinicalTrials.gov/show/NCT03690869">https://ClinicalTrials.gov/show/NCT03690869</a> |
| NCT04254419 | Phase 1       | Not yet recruiting     | NK cells                                                                                                       | IT         | US                                                                                      | <a href="https://ClinicalTrials.gov/show/NCT04254419">https://ClinicalTrials.gov/show/NCT04254419</a> |
| NCT03879512 | Phase 1/2     | Recruiting             | Depletion of regulatory T cells / Surgery / Cancer vaccine / Checkpoint blockade                               | IT + OP    | Europe (DE)                                                                             | <a href="https://ClinicalTrials.gov/show/NCT03879512">https://ClinicalTrials.gov/show/NCT03879512</a> |
| NCT03043391 | Phase 1       | Active, not recruiting | Polio/Rhinovirus Recombinant (PVSRIPO)                                                                         | IT         | US                                                                                      | <a href="https://ClinicalTrials.gov/show/NCT03043391">https://ClinicalTrials.gov/show/NCT03043391</a> |
| NCT02684058 | Phase 2       | Active, not recruiting | Dabrafenib / Trametinib / Carboplatin / Vincristine                                                            | TT + CT    | US, CA, AR, BR, AU, IL, JP, Europe (BE, CZ, DK, FI, FR, DE, IT, NL, RU, ES, SE, CH, GB) | <a href="https://ClinicalTrials.gov/show/NCT02684058">https://ClinicalTrials.gov/show/NCT02684058</a> |
| NCT02323880 | Phase 1       | Active, not recruiting | Selinexor                                                                                                      | TT         | US                                                                                      | <a href="https://ClinicalTrials.gov/show/NCT02323880">https://ClinicalTrials.gov/show/NCT02323880</a> |
| NCT03598244 | Phase 1       | Recruiting             | Savolitinib                                                                                                    | TT         | US                                                                                      | <a href="https://ClinicalTrials.gov/show/NCT03598244">https://ClinicalTrials.gov/show/NCT03598244</a> |
| NCT02885324 | Phase 2       | Recruiting             | Cabozantinib                                                                                                   | TT         | US                                                                                      | <a href="https://ClinicalTrials.gov/show/NCT02885324">https://ClinicalTrials.gov/show/NCT02885324</a> |
| NCT01130077 | Phase 1       | Active, not recruiting | HLA-A2 restricted glioma antigen peptides vaccine / Poly-ICLC                                                  | IT         | US                                                                                      | <a href="https://ClinicalTrials.gov/show/NCT01130077">https://ClinicalTrials.gov/show/NCT01130077</a> |
| NCT03893487 | Early Phase 1 | Recruiting             | Fimepinostat / Surgery                                                                                         | OTHER + OP | US, Europe (CH)                                                                         | <a href="https://ClinicalTrials.gov/show/NCT03893487">https://ClinicalTrials.gov/show/NCT03893487</a> |
| NCT02208362 | Phase 1       | Active, not recruiting | IL13Alpha2-specific Hinge-optimized 4-1BB-co-stimulatory CAR/Truncated CD19-expressing Autologous TN/MEM Cells | IT         | US                                                                                      | <a href="https://ClinicalTrials.gov/show/NCT02208362">https://ClinicalTrials.gov/show/NCT02208362</a> |
| NCT04730349 | Phase 1/2     | Recruiting             | Nivolumab / NKTR-214                                                                                           | IT         | US, AU, CA, Europe (FR, DE, IT, NL, ES, GB)                                             | <a href="https://ClinicalTrials.gov/show/NCT04730349">https://ClinicalTrials.gov/show/NCT04730349</a> |
| NCT02644291 | Phase 1       | Recruiting             | Mebendazole                                                                                                    | OTHER      | US                                                                                      | <a href="https://ClinicalTrials.gov/show/NCT02644291">https://ClinicalTrials.gov/show/NCT02644291</a> |
| NCT03605550 | Phase 1       | Recruiting             | PTC596 / Radiotherapy                                                                                          | TT + RT    | US                                                                                      | <a href="https://ClinicalTrials.gov/show/NCT03605550">https://ClinicalTrials.gov/show/NCT03605550</a> |
| NCT02020720 | Early Phase 1 | Active, not recruiting | Fluorine F 18 Fluorodopa / Biopsy / Therapeutic Surgery / CT / MRI / PET                                       | OP         | US                                                                                      | <a href="https://ClinicalTrials.gov/show/NCT02020720">https://ClinicalTrials.gov/show/NCT02020720</a> |
| NCT03233204 | Phase 2       | Active, not recruiting | Olaparib                                                                                                       | TT         | US, PR                                                                                  | <a href="https://ClinicalTrials.gov/show/NCT03233204">https://ClinicalTrials.gov/show/NCT03233204</a> |
| NCT02457845 | Phase 1       | Active, not recruiting | G207                                                                                                           | IT         | US                                                                                      | <a href="https://ClinicalTrials.gov/show/NCT02457845">https://ClinicalTrials.gov/show/NCT02457845</a> |

**Supplementary Table S2:**
**Ongoing early phase clinical trials including paediatric patients with recurrent/progressing pHGG (n=56)**  
 (ClinicalTrials.gov, EudraCT; status: ongoing; 8 March 2022)

| ID                      | Phase     | Status                 | Intervention                                                                                                                                 | Type            | Country                             | Link                                                                                                                                                                                                  |
|-------------------------|-----------|------------------------|----------------------------------------------------------------------------------------------------------------------------------------------|-----------------|-------------------------------------|-------------------------------------------------------------------------------------------------------------------------------------------------------------------------------------------------------|
| NCT03213652             | Phase 2   | Recruiting             | Ensartinib                                                                                                                                   | TT              | US                                  | <a href="https://ClinicalTrials.gov/show/NCT03213652">https://ClinicalTrials.gov/show/NCT03213652</a>                                                                                                 |
| NCT03213665             | Phase 2   | Active, not recruiting | Tazemetostat                                                                                                                                 | TT              | US, PR                              | <a href="https://ClinicalTrials.gov/show/NCT03213665">https://ClinicalTrials.gov/show/NCT03213665</a>                                                                                                 |
| NCT03434262             | Phase 1   | Recruiting             | Gemcitabine / Ribociclib / Sonidegib / Trametinib / Filgrastim                                                                               | TT + CT         | US                                  | <a href="https://ClinicalTrials.gov/show/NCT03434262">https://ClinicalTrials.gov/show/NCT03434262</a>                                                                                                 |
| NCT03213704             | Phase 2   | Recruiting             | Larotrectinib Sulfate                                                                                                                        | TT              | US, PR                              | <a href="https://ClinicalTrials.gov/show/NCT03213704">https://ClinicalTrials.gov/show/NCT03213704</a>                                                                                                 |
| NCT03526250             | Phase 2   | Recruiting             | Palbociclib                                                                                                                                  | TT              | US, PR                              | <a href="https://ClinicalTrials.gov/show/NCT03526250">https://ClinicalTrials.gov/show/NCT03526250</a>                                                                                                 |
| NCT03220035             | Phase 2   | Active, not recruiting | Vemurafenib                                                                                                                                  | TT              | US, PR                              | <a href="https://ClinicalTrials.gov/show/NCT03220035">https://ClinicalTrials.gov/show/NCT03220035</a>                                                                                                 |
| NCT03749187             | Phase 1   | Recruiting             | PARP Inhibitor BGB-290 / Temozolomide                                                                                                        | TT + CT         | US                                  | <a href="https://ClinicalTrials.gov/show/NCT03749187">https://ClinicalTrials.gov/show/NCT03749187</a>                                                                                                 |
| NCT03257631             | Phase 2   | Active, not recruiting | Pomalidomide                                                                                                                                 | OTHER           | US, Europe (FR, IT, ES, GB)         | <a href="https://ClinicalTrials.gov/show/NCT03257631">https://ClinicalTrials.gov/show/NCT03257631</a>                                                                                                 |
| NCT03210714             | Phase 2   | Recruiting             | Erdafitinib                                                                                                                                  | TT              | US, PR                              | <a href="https://ClinicalTrials.gov/show/NCT03210714">https://ClinicalTrials.gov/show/NCT03210714</a>                                                                                                 |
| NCT01884740             | Phase 1/2 | Recruiting             | SIACI of Eribitux and Bevacizumab                                                                                                            | TT (Intervent.) | US                                  | <a href="https://ClinicalTrials.gov/show/NCT01884740">https://ClinicalTrials.gov/show/NCT01884740</a>                                                                                                 |
| NCT03245151             | Phase 1/2 | Active, not recruiting | Lenvatinib / Everolimus                                                                                                                      | TT              | US, CA                              | <a href="https://ClinicalTrials.gov/show/NCT03245151">https://ClinicalTrials.gov/show/NCT03245151</a>                                                                                                 |
| NCT04238819             | Phase 1   | Recruiting             | Abemaciclib / Irinotecan / Temozolomide                                                                                                      | TT + CT         | US, JP, Europe (BE, FR, DE, IT, ES) | <a href="https://ClinicalTrials.gov/show/NCT04238819">https://ClinicalTrials.gov/show/NCT04238819</a>                                                                                                 |
| NCT04195555             | Phase 2   | Recruiting             | Ivosidenib                                                                                                                                   | TT              | US, PR                              | <a href="https://ClinicalTrials.gov/show/NCT04195555">https://ClinicalTrials.gov/show/NCT04195555</a>                                                                                                 |
| NCT03478462             | Phase 1   | Recruiting             | CLR 131                                                                                                                                      | Targeted RT     | US, AU, CA                          | <a href="https://ClinicalTrials.gov/show/NCT03478462">https://ClinicalTrials.gov/show/NCT03478462</a>                                                                                                 |
| NCT04521946             | Phase 1   | Recruiting             | Etoposide / Fludarabine / Thiotepa / Melphalan / Hematopoietic Cell Transplantation / Lapine T-Lymphocyte Immune Globulin / MMF / Tacrolimus | CT + IT         | US                                  | <a href="https://ClinicalTrials.gov/show/NCT04521946">https://ClinicalTrials.gov/show/NCT04521946</a>                                                                                                 |
| NCT04320888             | Phase 2   | Recruiting             | Selpercatinib                                                                                                                                | TT              | US, PR                              | <a href="https://ClinicalTrials.gov/show/NCT04320888">https://ClinicalTrials.gov/show/NCT04320888</a>                                                                                                 |
| NCT04284774             | Phase 2   | Recruiting             | Tipifarnib                                                                                                                                   | TT              | US, PR                              | <a href="https://ClinicalTrials.gov/show/NCT04284774">https://ClinicalTrials.gov/show/NCT04284774</a>                                                                                                 |
| NCT05135975             | Phase 2   | Recruiting             | Cabozantinib                                                                                                                                 | TT              | US                                  | <a href="https://ClinicalTrials.gov/show/NCT05135975">https://ClinicalTrials.gov/show/NCT05135975</a>                                                                                                 |
| EudraCT: 2020-000854-85 | Phase 1/2 | Ongoing                | Bempegaldesleukin / Nivolumab                                                                                                                | IT              | Europe (FR, DE, IT, ES)             | <a href="https://www.clinicaltrialsregister.eu/ctr-search/search?query=eudract_number:2020-000854-85">https://www.clinicaltrialsregister.eu/ctr-search/search?query=eudract_number:2020-000854-85</a> |
| EudraCT: 2018-000096-32 | Phase 1/2 | Ongoing                | Nivolumab and metronomic chemotherapy                                                                                                        | IT + CT         | Europe (BE, FR)                     | <a href="https://www.clinicaltrialsregister.eu/ctr-search/search?query=eudract_number:2018-000096-32">https://www.clinicaltrialsregister.eu/ctr-search/search?query=eudract_number:2018-000096-32</a> |
| EudraCT: 2009-016080-11 |           | Ongoing                | Gemcitabine / Thiotepa / Etoposide / Melphalan / Irinotecan / Carboplatin / Bevacizumab / Erlotinib / Everolimus                             | CT + TT         | Europe (NL)                         | <a href="https://www.clinicaltrialsregister.eu/ctr-search/search?query=eudract_number:2009-016080-11">https://www.clinicaltrialsregister.eu/ctr-search/search?query=eudract_number:2009-016080-11</a> |
| EudraCT: 2017-002762-44 | Phase 1/2 | Ongoing                | Pegylated recombinant human Arginase (BCT-100)                                                                                               | OTHER           | Europe (IE, NL, GB)                 | <a href="https://www.clinicaltrialsregister.eu/ctr-search/search?query=eudract_number:2017-002762-44">https://www.clinicaltrialsregister.eu/ctr-search/search?query=eudract_number:2017-002762-44</a> |
| EudraCT: 2014-001929-32 | Phase 2   | Ongoing                | Erlotinib / Everolimus / Dasatinib                                                                                                           | TT              | Europe (DK, FR, NL, ES, SE, GB)     | <a href="https://www.clinicaltrialsregister.eu/ctr-search/search?query=eudract_number:2014-001929-32">https://www.clinicaltrialsregister.eu/ctr-search/search?query=eudract_number:2014-001929-32</a> |

**Supplementary Table S2:****Ongoing early phase clinical trials including paediatric patients with recurrent/progressing pHGG (n=56)**  
(ClinicalTrials.gov, EudraCT; status: ongoing; 8 March 2022)

| ID                      | Phase     | Status                 | Intervention                                            | Type    | Country                                                     | Link                                                                                                                                                                                                  |
|-------------------------|-----------|------------------------|---------------------------------------------------------|---------|-------------------------------------------------------------|-------------------------------------------------------------------------------------------------------------------------------------------------------------------------------------------------------|
| EudraCT: 2014-004685-25 | Phase 1/2 | Active, not recruiting | Cobimetinib                                             | TT      | Europe (DK, FR, DE, IE, IT, NL, ES, GB)                     | <a href="https://www.clinicaltrialsregister.eu/ctr-search/search?query=eudract_number:2014-004685-25">https://www.clinicaltrialsregister.eu/ctr-search/search?query=eudract_number:2014-004685-25</a> |
| EudraCT: 2021-001375-16 |           | Ongoing                |                                                         | TT      | Europe (PL)                                                 | <a href="https://www.clinicaltrialsregister.eu/ctr-search/search?query=eudract_number:2021-001375-16">https://www.clinicaltrialsregister.eu/ctr-search/search?query=eudract_number:2021-001375-16</a> |
| EudraCT: 2019-000212-28 | Phase 1/2 | Ongoing                | LOXO-292                                                | TT      | Europe (DK, FR, DE, IT, ES)                                 | <a href="https://www.clinicaltrialsregister.eu/ctr-search/search?query=eudract_number:2019-000212-28">https://www.clinicaltrialsregister.eu/ctr-search/search?query=eudract_number:2019-000212-28</a> |
| EudraCT: 2014-004438-24 | Phase 2   | Ongoing                | Depatuxizumab mafodotin (ABT-414) / Temozolomide / CCNU | TT + CT | Europe (AT, BE, CZ, FI, FR, DE, HU, IE, IT, NL, PL, ES, GB) | <a href="https://www.clinicaltrialsregister.eu/ctr-search/search?query=eudract_number:2014-004438-24">https://www.clinicaltrialsregister.eu/ctr-search/search?query=eudract_number:2014-004438-24</a> |
| EudraCT: 2016-003498-16 | Phase 1/2 | Ongoing                | LOXO-101                                                | TT      | Europe (CZ, DK, FR, DE, IE, IT, NL, PL, ES, SE, GB)         | <a href="https://www.clinicaltrialsregister.eu/ctr-search/search?query=eudract_number:2016-003498-16">https://www.clinicaltrialsregister.eu/ctr-search/search?query=eudract_number:2016-003498-16</a> |

**Supplementary Table S2. Ongoing early phase clinical trials including paediatric patients with recurrent/progressing pHGG (n=56).**

The online search was conducted on 8 March 2022 at ClinicalTrials.gov (<https://clinicaltrials.gov>) (n=46) and the EU Clinical Trials Register (<https://www.clinicaltrialsregister.eu>) (n=10).

Search terms: “HG” OR “High-grade glioma” AND “relapsed” OR “recurrent”; advanced search: children; (not yet) recruiting; enrolling by invitation; active, not recruiting.

Of the 56 trials, n=44 (79%) are being conducted (mainly) at US sites, and n=17 (30%) involved sites in European countries. Most trials investigate targeted treatment (n=29, 52%) or immunotherapeutic approaches (n=16, 29%) alone or combined with conventional treatment modalities.

*Abbreviations:* IT, immunotherapy; CT, chemotherapy; TTF, tumour-treating fields; TT, targeted treatment; RT, radiotherapy; OP, surgery.
