# Supplementary material for: How I treat recurrent pediatric high-grade glioma (pHGG): a Europe-wide survey study
Source: PubMed Central journal article supplement (PMC9992031; doi:10.1007/s11060-023-04241-6), 2023-02-01
Supplement: 11060_2023_4241_MOESM3_ESM.pdf [file 11060_2023_4241_MOESM3_ESM.pdf]

**Supplementary Table S3. Responses by country of employment (Germany vs. other countries).**

| Treatment                           | Answers total | Germany (%) | Other Countries (%) | p-value           |
|-------------------------------------|---------------|-------------|---------------------|-------------------|
| Respondents                         | n=139         | n=69        | n=70                | Fisher's exact    |
| Palliative care                     | 16.4 %        | 19.2        | 13.8                |                   |
| Oncological treatment               | 83.6 %        | 80.8        | 86.2                | 0.1507            |
| Curative intent                     | 44.8 %        | 42.7        | 46.6                |                   |
| Non-curative intent                 | 55.2 %        | 57.3        | 53.4                | 0.5218            |
| Phase I/II trials                   | 88.7 %        | 87.7        | 89.5                | 0.6135            |
| <u>Surgery</u>                      | 43.4 %        | 39.4        | 46.8                | 0.1893            |
| Maximal safe resection              | 79.9 %        | 77.0        | 81.8                |                   |
| Biopsy                              | 20.1 %        | 23.0        | 18.2                | 0.5355            |
| Molecular workup                    | 95.3 %        | 95.1        | 95.5                | >0.9999           |
| <u>(Re-) Irradiation</u>            | 69.5 %        | 69.0        | 69.9                | 0.9062            |
| Local radiotherapy                  | 81.3 %        | 76.4        | 85.3                |                   |
| Craniospinal radiotherapy           | 18.7 %        | 23.6        | 14.7                | 0.0943            |
| Dose ≤20 Gy                         | 32.3 %        | 34.9        | 30.2                |                   |
| Dose >20 Gy                         | 67.7 %        | 65.1        | 69.8                | 0.4849            |
| <u>Chemotherapy</u>                 | 57.6 %        | 58.8        | 56.6                | 0.7394            |
| Lomustine (CCNU)                    | 17.1 %        | 12.2        | 21.4                | 0.1248            |
| Monotherapy                         | 42.4 %        | 27.3        | 10.7                |                   |
| CCNU + Bevacizumab                  | 24.2 %        | 9.1         | 6.8                 |                   |
| CCNU + Temozolomide                 | 24.2 %        | 45.5        | 2.9                 |                   |
| <b>Procarbazine + CCNU + VCR</b>    | 7.8 %         | <b>1.1</b>  | <b>13.6</b>         | <b>0.0009</b>     |
| Temozolomide                        | 19.2 %        | 21.1        | 17.5                | 0.5842            |
| <b>Etoposide + Trofo. oral</b>      | 7.8 %         | <b>15.6</b> | <b>1.0</b>          | <b>0.0002</b>     |
| Topo./Eto. +/- Cy oral              | 7.3 %         | 8.9         | 5.8                 | 0.5795            |
| <b>Modified HIT-SKK</b>             | 5.2 %         | <b>8.9</b>  | <b>1.9</b>          | <b>0.0472</b>     |
| <b>Irinotecan + Bevacizumab</b>     | 4.1 %         | <b>0.0</b>  | <b>7.8</b>          | <b>0.0076</b>     |
| Vinblastine                         | 3.6 %         | 5.6         | 1.9                 | 0.2544            |
| Oral antiangiogenetic comb.         | 3.6 %         | 2.2         | 4.9                 | 0.4521            |
| Other Chemotherapy <sup>a</sup>     | 18.1 %        | 16.7        | 11.7                | 0.4060            |
| <b>CT plus HDAC inhibitors</b>      | 12.4 %        | <b>21.1</b> | <b>3.9</b>          | <b>0.0002</b>     |
| <b>CT plus Chloroquine</b>          | 2.6 %         | <b>5.6</b>  | <b>0.0</b>          | <b>0.0208</b>     |
| <u>Targeted therapy</u>             | 89.4 %        | 88.7        | 90.0                | 0.7224            |
| Depending on findings/trials        | 39.0 %        | 42.1        | 36.4                | 0.3388            |
| BRAF/MEK inhibitor                  | 44.4 %        | 40.6        | 47.5                | 0.2415            |
| BRAF inhibitor                      | 35.9 %        | 33.3        | 37.7                |                   |
| MEK inhibitor                       | 24.4 %        | 18.5        | 28.6                |                   |
| BRAFi + MEKi                        | 39.7 %        | 44.4        | 36.4                |                   |
| Anti EGFR                           | 7.5 %         | 4.5         | 10.5                | 0.0794            |
| TKI (Erlotinib)                     | 45.5 %        | 40.0        | 47.1                |                   |
| Nimotuzumab                         | 31.8 %        | 20.0        | 35.3                |                   |
| EZH2 inhibitor                      | 3.7 %         | 1.5         | 5.6                 | 0.1191            |
| CDK inhibitor                       | 2.0 %         | 1.5         | 2.5                 | 0.6935            |
| TRK inhibitor                       | 2.0 %         | 0.8         | 3.1                 | 0.2276            |
| DRD2 inhibitor (ONC201)             | 2.0 %         | 2.3         | 1.9                 | >0.9999           |
| mTOR inhibitor                      | 2.0 %         | 0.8         | 3.7                 | 0.1333            |
| Other targeted therapy <sup>b</sup> | 3.4 %         | 3.8         | 3.1                 | 0.7584            |
| <b>Bevacizumab</b>                  | 12.2 %        | <b>3.0</b>  | <b>19.8</b>         | <b>&lt;0.0001</b> |
| <u>Immunotherapy</u>                | 43.3 %        | 48.7        | 38.8                | 0.0747            |
| <b>Checkpoint inhibitor</b>         | 30.3 %        | <b>39.7</b> | <b>17.4</b>         | <b>0.0051</b>     |
| Nivolumab                           | 48.8 %        | 48.1        | 50.0                |                   |
| plus Entinostat                     | 42.9 %        | 29.6        | 12.5                |                   |
| plus Vaccine                        | 27.9 %        | 37.0        | 25.0                |                   |
| Comb. (Ipilimumab)                  | 14.0 %        | 0.0         | 37.5                |                   |
| <b>Tumor vaccine</b>                | 16.2 %        | <b>26.0</b> | <b>5.8</b>          | <b>0.0051</b>     |
| Dendritic cells                     | 52.2 %        | 52.6        | 50.0                |                   |
| Other immunotherapy <sup>c</sup>    | 4.9 %         | 4.1         | 5.8                 | 0.7131            |
| Tumor-Treating Fields               | 15.9 %        | 16.0        | 15.8                | 0.0999            |
| <b>Intraventricular CT</b>          | 12.9 %        | <b>17.5</b> | <b>9.0</b>          | <b>0.0305</b>     |

### Supplementary Table S3. Responses by country of employment (Germany vs. other countries).

Chosen answers and free-text proposals by the respondents from Germany vs. other European countries. Percentage is related to the respective number of answers for each question. Bold font indicates a statistically significant difference.

a "Metronomic chemotherapy" not specified, 2.1%; HIT-HGG-Rez-Immunovac study, 2.1%; LGG chemotherapy (carboplatin, vincristine), 2.1%; vincristine or vinorelbine, 2.1%; PEI (cisplatin, etoposide, ifosfamide), 1.6%; carboplatin + etoposide, 1.6%; High-dose chemotherapy + autologous stem cell transfusion, 1.0%; RIST (rapamycin, irinotecan, dasatinib, temozolomide), 1.0%; ICE (ifosfamide, carboplatin, etoposide), 1.0%; carboplatin-based, 0.5%; eribulin, 0.5%; fotemustine, 0.5%; Metro-PD1, 0.5%; adriamycine, 0.5%; vindesine, 0.5%, VAC (vincristine, actinomycin-d, cyclophosphamide), 0.5%;

b Hedgehog inhibitor, 0.7%; PDGFR inhibitor, 0.3%; PIK3CA inhibitor, 0.3%; PARP inhibitor, 0.3%; ALK inhibitor, 0.3%;

c CAR-T cells, 3.5%; Oncolytic virus, 1.4%;

d BRAFV600E mutation and SMARCB1 deletion;

e EGFR overexpression and CDKN2A deletion;

f KIAA1549-BRAF fusion

*Abbreviations:* VCR, vincristine; Trofo, trofosfamide; Topo, topotecan; Eto, etoposide; Cy, cyclophosphamide; comb., combination; CT, chemotherapy; TKI, tyrosine kinase inhibitor.
